# Supplementary material for: The Native Soil Microbiome is Critical for Early Root-associated Microbiota Assembly and Canola Growth
Source: Research Square preprint supplement (doi:10.21203/rs.3.rs-6787567/v1), 2025-06-17
Supplement: Supplementary file 1 [file 9fb482b70751c1e7f2c9be69.xlsx]

## Sheet: Table S1
Table S1
	Bacteria				Fungi
	R2	F	Pr(>F)		R2	F	Pr(>F)
Unplanted soil
Soil	0.118	4.13	0.001		0.077	2.43	0.001
Time	0.117	4.111	0.001		0.098	3.091	0.001
Soil:Time	0.082	2.897	0.001		0.064	2.007	0.004
Rhizosphere soil
Soil	0.405	14.05	0.001		0.206	5.192	0.001
Genotype	0.041	1.431	0.242		0.042	1.06	0.284
Soil:Genotype	0.034	1.193	0.287		0.038	0.951	0.486
Root
Soil	0.351	11.419	0.001		0.122	2.791	0.001
Genotype	0.057	1.866	0.094		0.051	1.169	0.15
Soil:Genotype	0.038	1.238	0.272		0.042	0.955	0.588

## Sheet: Table S2
Table S2
Bacterial ASV	Phylum	Class	Order	Family	Genus	Species	Ctrl	Gam
ASV147	Actinobacteriota	Actinobacteria	Micrococcales	Microbacteriaceae	Curtobacterium	Unclassified		+
ASV1407	Actinobacteriota	Actinobacteria	Micrococcales	Microbacteriaceae	Leifsonia	Unclassified		+
ASV1416	Actinobacteriota	Actinobacteria	Micrococcales	Microbacteriaceae	Leifsonia	Unclassified		+
ASV44	Actinobacteriota	Actinobacteria	Micrococcales	Micrococcaceae	Unclassified	Unclassified		+
ASV243	Actinobacteriota	Actinobacteria	Streptomycetales	Streptomycetaceae	Streptomyces	Unclassified	+
ASV1405	Bacteroidota	Bacteroidia	Sphingobacteriales	Sphingobacteriaceae	Mucilaginibacter	Unclassified		+
ASV68	Chloroflexi	Ktedonobacteria	Ktedonobacterales	Ktedonobacteraceae	uncultured	Unclassified	+
ASV63	Chloroflexi	Ktedonobacteria	Ktedonobacterales	Ktedonobacteraceae	uncultured	uncultured Clostridiales	+
ASV60	Chloroflexi	Ktedonobacteria	Ktedonobacterales	Ktedonobacteraceae	uncultured	uncultured Ktedobacteria	+
ASV252	Chloroflexi	Ktedonobacteria	Ktedonobacterales	Ktedonobacteraceae	uncultured	uncultured Thermosporothrix	+
ASV1658	Firmicutes	Bacilli	Bacillales	Sporolactobacillaceae	Pullulanibacillus	uncultured bacterium		+
ASV4	Proteobacteria	Alphaproteobacteria	Rhizobiales	Beijerinckiaceae	Methylobacterium-Methylorubrum	Unclassified		+
ASV1652	Proteobacteria	Alphaproteobacteria	Rhizobiales	Rhizobiaceae	Allorhizobium-Neorhizobium-Pararhizobium-Rhizobium	Unclassified		+
ASV31	Proteobacteria	Alphaproteobacteria	Sphingomonadales	Sphingomonadaceae	Sphingomonas	Unclassified	+
ASV6	Proteobacteria	Betaproteobacteria	Burkholderiales	Oxalobacteraceae	Massilia	Unclassified		+
ASV861	Proteobacteria	Betaproteobacteria	Burkholderiales	Oxalobacteraceae	Massilia	uncultured Telluria		+

## Sheet: Table S3
Table S3
Fungal ASV	Phylum	Class	Order	Family	Genus	Species	Ctrl	Gam
ASV83	Ascomycota	Dothideomycetes	Capnodiales	Cladosporiaceae	Cladosporium	Cladosporium adianticola	+
ASV7	Ascomycota	Dothideomycetes	Pleosporales	Pleosporaceae	Alternaria	Alternaria prunicola	+
ASV27	Ascomycota	Dothideomycetes	Pleosporales	Unclassified	Unclassified	Unclassified	+
ASV79	Ascomycota	Eurotiomycetes	Eurotiales	Aspergillaceae	Penicillium	Penicillium concentricum		+
ASV36	Ascomycota	Sordariomycetes	Hypocreales	Clavicipitaceae	Metacordyceps	Metacordyceps chlamydosporia	+
ASV5	Ascomycota	Sordariomycetes	Hypocreales	Hypocreaceae	Trichoderma	Trichoderma atrobrunneum		+
ASV2	Ascomycota	Sordariomycetes	Hypocreales	Nectriaceae	Fusarium	Fusarium fujikuroi	+
ASV13	Ascomycota	Sordariomycetes	Hypocreales	Nectriaceae	Fusarium	Unclassified	+
ASV11	Ascomycota	Sordariomycetes	Hypocreales	Nectriaceae	Gibberella	Gibberella avenacea	+
ASV121	Ascomycota	Sordariomycetes	Hypocreales	Stachybotryaceae	Stachybotrys	Stachybotrys chartarum		+
ASV9	Ascomycota	Sordariomycetes	Sordariales	Chaetomiaceae	Humicola	Humicola nigrescens	+
ASV6	Basidiomycota	Tremellomycetes	Filobasidiales	Piskurozymaceae	Solicoccozyma	Solicoccozyma aeria		+
ASV1	Mortierellomycota	Mortierellomycetes	Mortierellales	Mortierellaceae	Mortierella	Mortierella rishikesha		+
ASV15	Mortierellomycota	Mortierellomycetes	Mortierellales	Mortierellaceae	Mortierella	Mortierella rishikesha	+

## Sheet: Table S4
Table S4
Bacterial ASVs	Phylum	Class	Order	Family	Genus	Species	Ctrl	Gam
ASV1335	Proteobacteria	Betaproteobacteria	Burkholderiales	uncultured	uncultured	beta_proteobacterium		+
ASV39	Actinobacteriota	Thermoleophilia	Gaiellales	uncultured	uncultured	uncultured_actinobacterium	+
ASV33	Acidobacteriota	Acidobacteriae	Acidobacteriales	uncultured	uncultured	uncultured_forest	+
ASV639	Proteobacteria	Gammaproteobacteria	Xanthomonadales	Xanthomonadaceae	Lysobacter	uncultured_Thermomonas	+
ASV1334	Proteobacteria	Alphaproteobacteria	Rhizobiales	Xanthobacteraceae	Unclassified	Unclassified		+
ASV34	Proteobacteria	Alphaproteobacteria	Rhizobiales	Xanthobacteraceae	Unclassified	Unclassified	+
ASV5	Firmicutes	Bacilli	Bacillales	Sporolactobacillaceae	Pullulanibacillus	uncultured_bacterium		+
ASV857	Proteobacteria	Alphaproteobacteria	Sphingomonadales	Sphingomonadaceae	Sphingomonas	Unclassified		+
ASV2	Proteobacteria	Alphaproteobacteria	Sphingomonadales	Sphingomonadaceae	Sphingomonas	Unclassified		+
ASV45	Proteobacteria	Alphaproteobacteria	Sphingomonadales	Sphingomonadaceae	Sphingomonas	Unclassified	+
ASV31	Proteobacteria	Alphaproteobacteria	Sphingomonadales	Sphingomonadaceae	Sphingomonas	Unclassified	+
ASV1405	Bacteroidota	Bacteroidia	Sphingobacteriales	Sphingobacteriaceae	Mucilaginibacter	Unclassified		+
ASV1415	Bacteroidota	Bacteroidia	Sphingobacteriales	Sphingobacteriaceae	Pedobacter	Unclassified		+
ASV1440	Bacteroidota	Bacteroidia	Sphingobacteriales	Sphingobacteriaceae	Mucilaginibacter	Mucilaginibacter_pocheonensis		+
ASV82	Proteobacteria	Betaproteobacteria	Burkholderiales	SC-I-84	SC-I-84	Unclassified	+
ASV921	Proteobacteria	Gammaproteobacteria	Xanthomonadales	Rhodanobacteraceae	Unclassified	Unclassified	+
ASV561	Proteobacteria	Alphaproteobacteria	Rhizobiales	Rhizobiaceae	Allorhizobium-Neorhizobium-Pararhizobium-Rhizobium	Unclassified		+
ASV1652	Proteobacteria	Alphaproteobacteria	Rhizobiales	Rhizobiaceae	Allorhizobium-Neorhizobium-Pararhizobium-Rhizobium	Unclassified		+
ASV889	Proteobacteria	Alphaproteobacteria	Rhizobiales	Rhizobiaceae	Allorhizobium-Neorhizobium-Pararhizobium-Rhizobium	Unclassified		+
ASV1659	Firmicutes	Bacilli	Paenibacillales	Paenibacillaceae	Oxalophagus	uncultured_bacterium		+
ASV22	Firmicutes	Bacilli	Paenibacillales	Paenibacillaceae	Paenibacillus	Paenibacillus_rigui		+
ASV1411	Firmicutes	Bacilli	Paenibacillales	Paenibacillaceae	Paenibacillus	Unclassified		+
ASV1408	Proteobacteria	Betaproteobacteria	Burkholderiales	Oxalobacteraceae	Massilia	Unclassified		+
ASV1418	Proteobacteria	Betaproteobacteria	Burkholderiales	Oxalobacteraceae	Massilia	Unclassified		+
ASV1422	Proteobacteria	Betaproteobacteria	Burkholderiales	Oxalobacteraceae	Massilia	Unclassified		+
ASV1908	Proteobacteria	Betaproteobacteria	Burkholderiales	Oxalobacteraceae	Massilia	Unclassified		+
ASV1403	Actinobacteriota	Actinobacteria	Propionibacteriales	Nocardioidaceae	Nocardioides	Nocardioides_sp.		+
ASV40	Actinobacteriota	Actinobacteria	Propionibacteriales	Nocardioidaceae	Nocardioides	Unclassified	+
ASV44	Actinobacteriota	Actinobacteria	Micrococcales	Micrococcaceae	Unclassified	Unclassified		+
ASV1407	Actinobacteriota	Actinobacteria	Micrococcales	Microbacteriaceae	Leifsonia	Unclassified		+
ASV1416	Actinobacteriota	Actinobacteria	Micrococcales	Microbacteriaceae	Leifsonia	Unclassified		+
ASV147	Actinobacteriota	Actinobacteria	Micrococcales	Microbacteriaceae	Curtobacterium	Unclassified		+
ASV38	Acidobacteriota	Acidobacteriae	Acidobacteriales	Koribacteraceae	Candidatus_Koribacter	uncultured_bacterium	+
ASV37	Chloroflexi	Ktedonobacteria	Ktedonobacterales	JG30-KF-AS9	JG30-KF-AS9	uncultured_bacterium	+
ASV32	Chloroflexi	Ktedonobacteria	Ktedonobacterales	JG30-KF-AS9	JG30-KF-AS9	uncultured_soil	+
ASV71	Gemmatimonadota	Gemmatimonadetes	Gemmatimonadales	Gemmatimonadaceae	Gemmatimonas	uncultured_bacterium	+
ASV1218	Proteobacteria	Betaproteobacteria	Burkholderiales	Comamonadaceae	Ramlibacter	Unclassified	+
ASV760	Bacteroidota	Bacteroidia	Chitinophagales	Chitinophagaceae	uncultured	Unclassified	+
ASV62	Chloroflexi	Ktedonobacteria	C0119	C0119	C0119	uncultured_Chloroflexi	+
ASV1404	Proteobacteria	Betaproteobacteria	Burkholderiales	Burkholderiaceae	Burkholderia-Caballeronia-Paraburkholderia	Unclassified		+
ASV7	Proteobacteria	Betaproteobacteria	Burkholderiales	Burkholderiaceae	Ralstonia	Unclassified		+
ASV1198	Proteobacteria	Betaproteobacteria	Burkholderiales	Burkholderiaceae	Burkholderia-Caballeronia-Paraburkholderia	Unclassified		+
ASV91	Acidobacteriota	Acidobacteriae	Bryobacterales	Bryobacteraceae	Bryobacter	uncultured_Acidobacteria	+
ASV35	Acidobacteriota	Acidobacteriae	Bryobacterales	Bryobacteraceae	Bryobacter	Unclassified	+
ASV12	Firmicutes	Bacilli	Bacillales	Bacillaceae	Bacillus	Unclassified		+
ASV1434	Firmicutes	Bacilli	Bacillales	Bacillaceae	Bacillus	Bacillus_ginsengihumi		+
ASV47	Firmicutes	Bacilli	Bacillales	Bacillaceae	Bacillus	uncultured_organism		+
ASV30	Firmicutes	Bacilli	Bacillales	Bacillaceae	Bacillus	uncultured_organism	+
ASV8	Firmicutes	Bacilli	Alicyclobacillales	Alicyclobacillaceae	Tumebacillus	Tumebacillus_ginsengisoli		+
ASV36	Actinobacteriota	Actinobacteria	Frankiales	Acidothermaceae	Acidothermus	Unclassified	+
ASV186	Acidobacteriota	Acidobacteriae	Acidobacteriales	Acidobacteriaceae_(Subgroup_1)	Acidipila	Unclassified	+
ASV115	Acidobacteriota	Acidobacteriae	Acidobacteriales	Acidobacteriaceae_(Subgroup_1)	Acidipila	Unclassified	+

## Sheet: Table S5
Table S5
Fungal ASVs	Phylum	Class	Order	Family	Genus	Species	Ctrl	Gam
ASV8	Chytridiomycota	Rhizophlyctidomycetes	Rhizophlyctidales	Unclassified	Unclassified	Rhizophlyctidales_sp	+
ASV77	Mucoromycota	Mucoromycetes	Mucorales	Rhizopodaceae	Rhizopus	Rhizopus_arrhizus		+
ASV47	Ascomycota	Leotiomycetes	Thelebolales	Pseudeurotiaceae	Pseudogymnoascus	Pseudogymnoascus_sp	+
ASV7	Ascomycota	Dothideomycetes	Pleosporales	Pleosporaceae	Alternaria	Alternaria_prunicola	+
ASV10	Basidiomycota	Tremellomycetes	Filobasidiales	Piskurozymaceae	Solicoccozyma	Unclassified	+
ASV6	Basidiomycota	Tremellomycetes	Filobasidiales	Piskurozymaceae	Solicoccozyma	Solicoccozyma_aeria	+
ASV14	Ascomycota	Sordariomycetes	Hypocreales	Nectriaceae	Fusarium	Fusarium_fujikuroi		+
ASV2	Ascomycota	Sordariomycetes	Hypocreales	Nectriaceae	Fusarium	Fusarium_fujikuroi	+
ASV22	Ascomycota	Sordariomycetes	Hypocreales	Nectriaceae	Fusicolla	Fusicolla_cassiae-fistulae	+
ASV38	Ascomycota	Sordariomycetes	Hypocreales	Nectriaceae	Fusarium	Unclassified	+
ASV30	Ascomycota	Sordariomycetes	Hypocreales	Nectriaceae	Fusarium	Fusarium_equiseti	+
ASV21	Ascomycota	Sordariomycetes	Hypocreales	Nectriaceae	Fusicolla	Fusicolla_cassiae-fistulae	+
ASV13	Ascomycota	Sordariomycetes	Hypocreales	Nectriaceae	Fusarium	Unclassified	+
ASV11	Ascomycota	Sordariomycetes	Hypocreales	Nectriaceae	Gibberella	Gibberella_avenacea	+
ASV147	Mucoromycota	Mucoromycetes	Mucorales	Mucoraceae	Mucor	Mucor_circinelloides		+
ASV1	Mortierellomycota	Mortierellomycetes	Mortierellales	Mortierellaceae	Mortierella	Mortierella_rishikesha		+
ASV16	Mortierellomycota	Mortierellomycetes	Mortierellales	Mortierellaceae	Linnemannia	Linnemannia_hyalina		+
ASV43	Mortierellomycota	Mortierellomycetes	Mortierellales	Mortierellaceae	Linnemannia	Linnemannia_zychae	+
ASV15	Mortierellomycota	Mortierellomycetes	Mortierellales	Mortierellaceae	Mortierella	Mortierella_rishikesha	+
ASV12	Ascomycota	Sordariomycetes	Hypocreales	Hypocreales_fam_Incertae_sedis	Acremonium	Unclassified		+
ASV5	Ascomycota	Sordariomycetes	Hypocreales	Hypocreaceae	Trichoderma	Trichoderma_atrobrunneum		+
ASV80	Ascomycota	Sordariomycetes	Hypocreales	Hypocreaceae	Trichoderma	Trichoderma_atrobrunneum		+
ASV105	Ascomycota	Sordariomycetes	Hypocreales	Hypocreaceae	Trichoderma	Trichoderma_erinaceum		+
ASV19	Basidiomycota	Tremellomycetes	Filobasidiales	Filobasidiaceae	Naganishia	Naganishia_albida		+
ASV3	Ascomycota	Sordariomycetes	Hypocreales	Cordycipitaceae	Leptobacillium	Leptobacillium_leptobactrum		+
ASV41	Ascomycota	Sordariomycetes	Coniochaetales	Coniochaetaceae	Coniochaeta	Coniochaeta_sp	+
ASV25	Ascomycota	Sordariomycetes	Coniochaetales	Coniochaetaceae	Lecythophora	Lecythophora_canina	+
ASV36	Ascomycota	Sordariomycetes	Hypocreales	Clavicipitaceae	Metacordyceps	Metacordyceps_chlamydosporia		+
ASV39	Ascomycota	Sordariomycetes	Sordariales	Chaetomiaceae	Chaetomium	Unclassified		+
ASV34	Ascomycota	Sordariomycetes	Sordariales	Chaetomiaceae	Chaetomium	Chaetomium_grande		+
ASV37	Ascomycota	Sordariomycetes	Sordariales	Chaetomiaceae	Chaetomium	Chaetomium_grande		+
ASV9	Ascomycota	Sordariomycetes	Sordariales	Chaetomiaceae	Humicola	Humicola_nigrescens	+
ASV20	Ascomycota	Eurotiomycetes	Eurotiales	Aspergillaceae	Talaromyces	Talaromyces_marneffei		+
ASV76	Ascomycota	Eurotiomycetes	Eurotiales	Aspergillaceae	Penicillium	Penicillium_concentricum		+
ASV79	Ascomycota	Eurotiomycetes	Eurotiales	Aspergillaceae	Penicillium	Penicillium_concentricum		+
ASV4	Ascomycota	Eurotiomycetes	Eurotiales	Aspergillaceae	Penicillium	Penicillium_corylophilum		+
ASV23	Ascomycota	Sordariomycetes	Xylariales	Amphisphaeriaceae	Microdochium	Unclassified	+
