# Supplementary material for: The Native Soil Microbiome is Critical for Early Root-associated Microbiota Assembly and Canola Growth
Source: Research Square preprint supplement (doi:10.21203/rs.3.rs-6787567/v1), 2025-06-17
Supplement: Supplementary file 2 [file fa5874818045520e2ed53a82.docx]

# **THE NATIVE SOIL MICROBIOME IS CRITICAL FOR EARLY ROOT-ASSOCIATED MICROBIOTA ASSEMLY AND CANOLA GROWTH**

Mengying Liu1,2, Leon V. Kochian1, Bobbi L. Helgason2*

1 Department of Plant Sciences, University of Saskatchewan, 51 Campus Drive, Saskatoon, SK, Canada S7N 5A8

2 Department of Soil Science, University of Saskatchewan, 51 Campus Drive, Saskatoon, SK, Canada S7N 5A8

* Corresponding author: Bobbi L. Helgason; Email: [Bobbi.Helgason@usask.ca](mailto:Bobbi.Helgason@usask.ca)

# **Supplemental Materials**

## **Supplemental Tables and Figures**

**
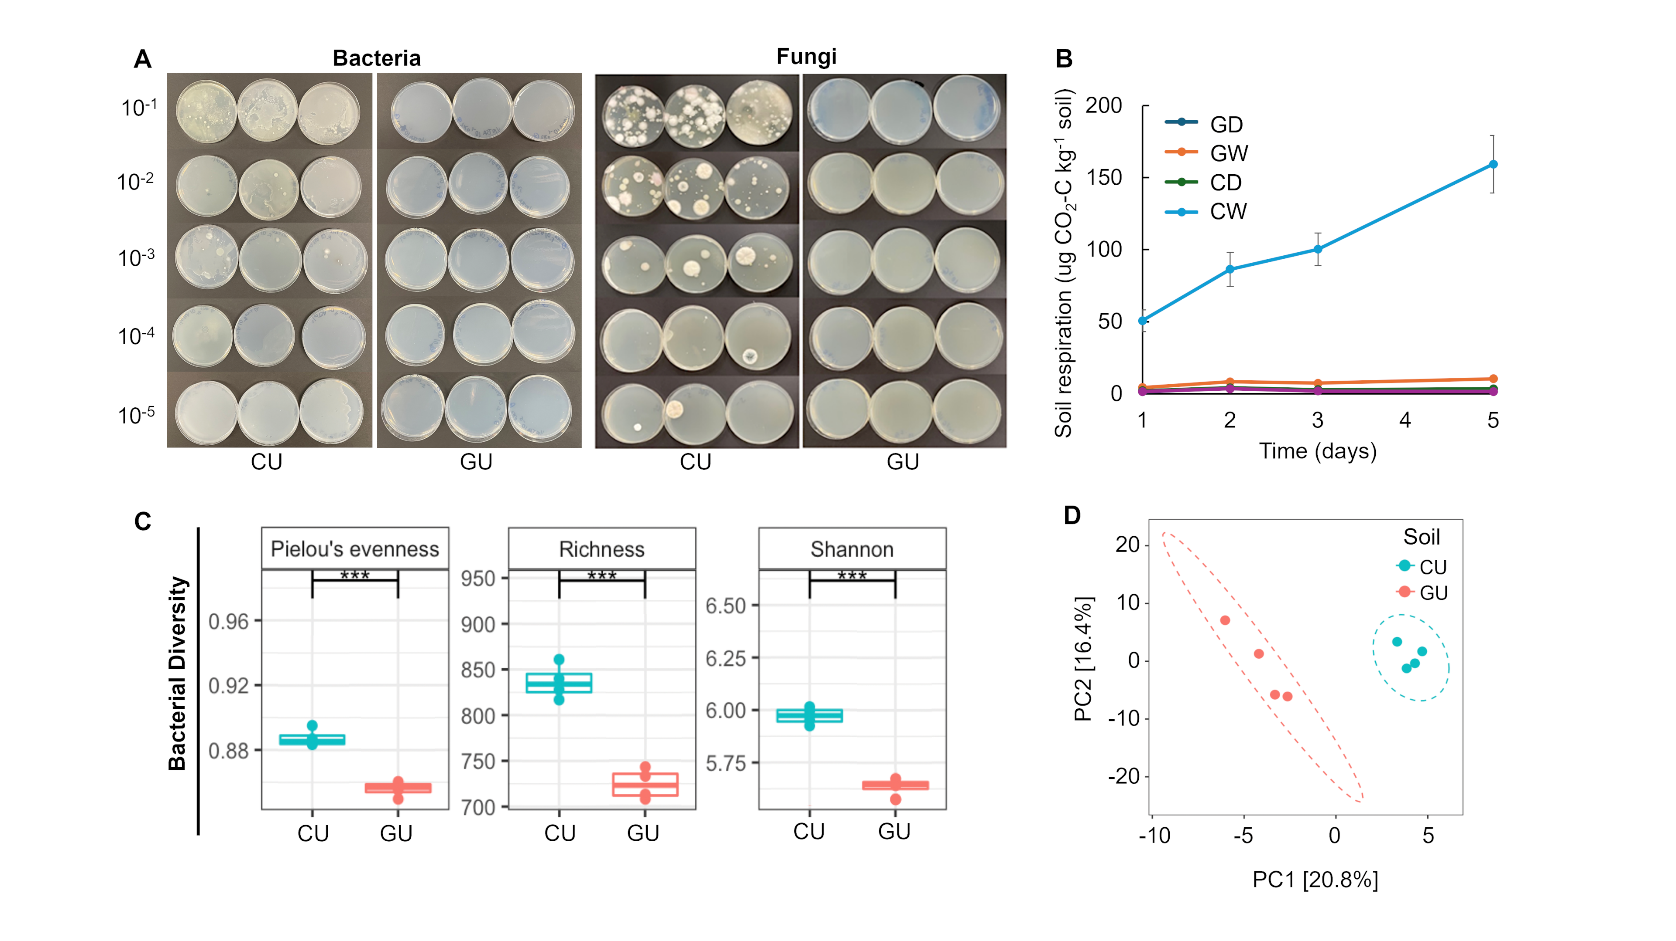
Fig. S1** Microbial analysis of control unplanted (CU) *vs.* gamma-irradiated (GU) unplanted soils: (**A**) Colony morphology of bacteria on 1/10 strength TSA media and fungi on PDA media; (**B**) Cumulative soil respiration from gamma-irradiated (G) and control (C) soils under dry (D) or moisture content (w/w) of 20% (W) incubation; (**C**) Bacterial alpha diversity metrics: Pielou’s evenness, observed ASVs, and Shannon-Wiener diversity; (**D**) PCA-based Beta diversity analysis of bacterial community structure. Error bars represent standard errors; *** indicated significant differences (p < 0.001; n = 3).

**
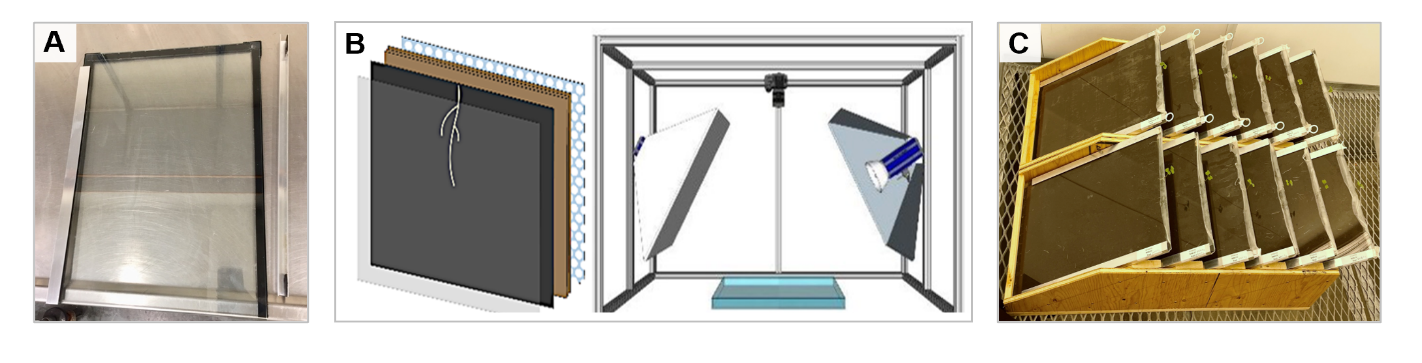
Fig. S2** Design and assembly of experimental growth systems: (**A**) Composition of the rhizobox; (**B**) 2D hydroponic growth pouch system integrated with a high-resolution root imaging platform for real-time root phenotypic analysis; (**C**) The processing hood configured for experimental set up and sampling.

**
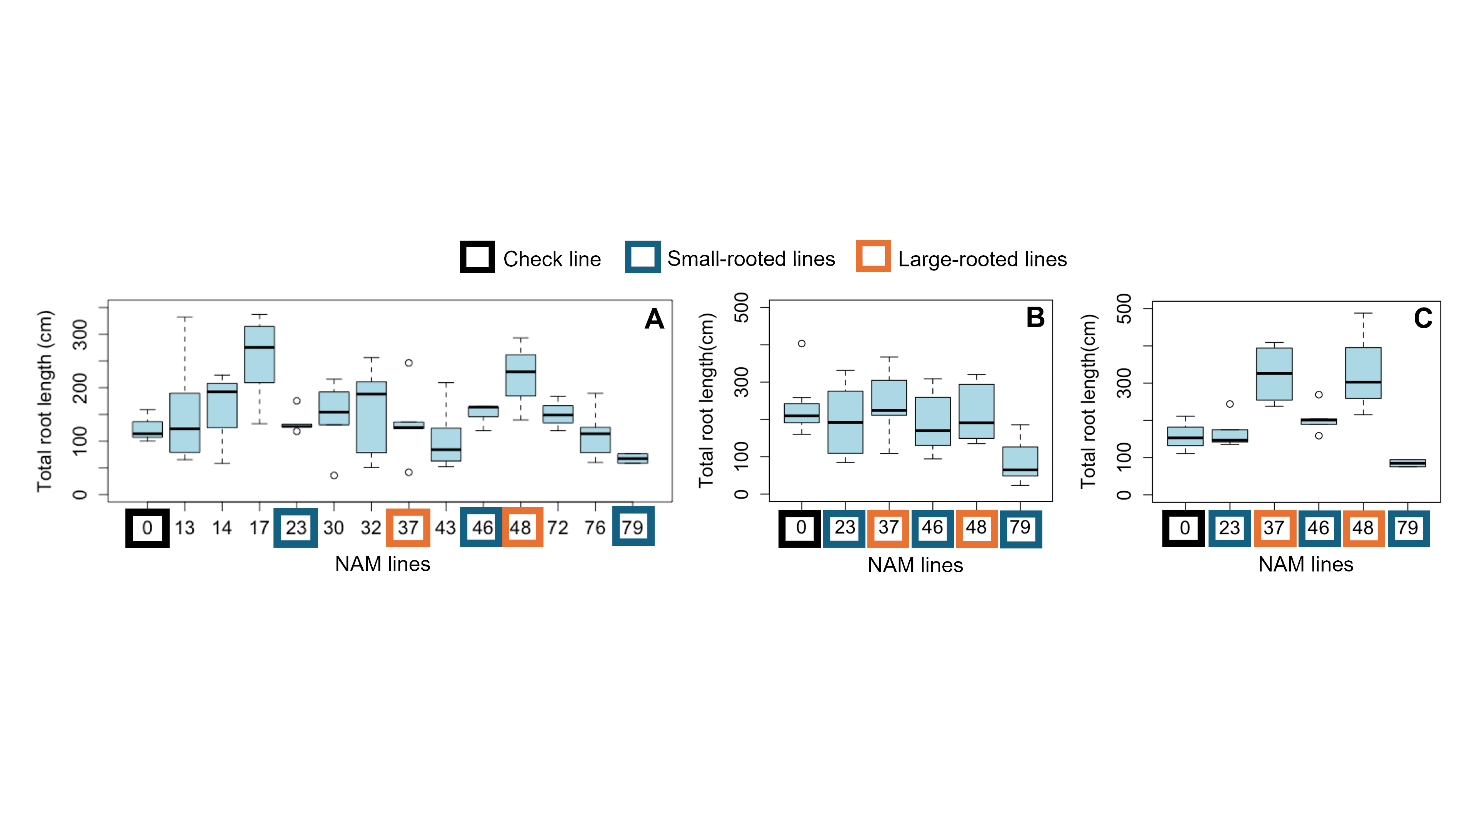
Fig. S3** Screening of canola genotypes with varied total root length in 2D hydroponics pouch system at T14: (**A**) broad screening; (**B**) focused screening; (**C**) final screening (n=8).


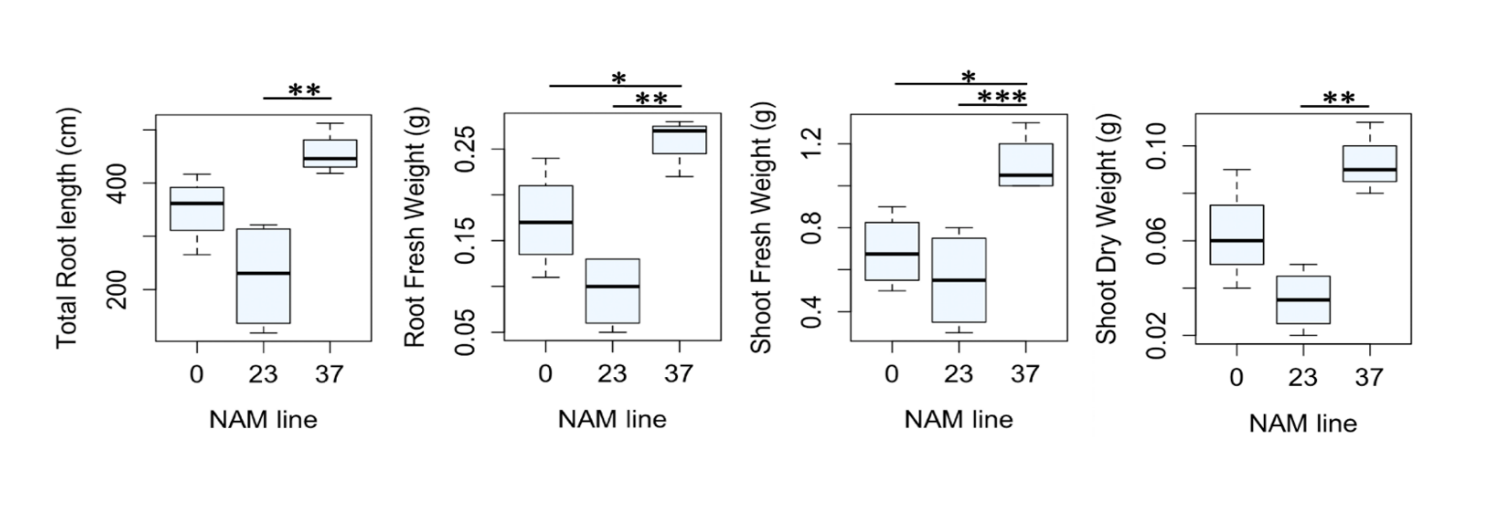
**Fig. S4** The total root lengths, root fresh weights, shoot fresh weights, shoot dry weights of canola NAM0, NAM23, and NAM37 grown in rhizoboxes at T14. Statistical significance was determined using ANOVA followed by Tukey’s test (* p < 0.05, ** p < 0.01, *** p<0.001; n=8).

**
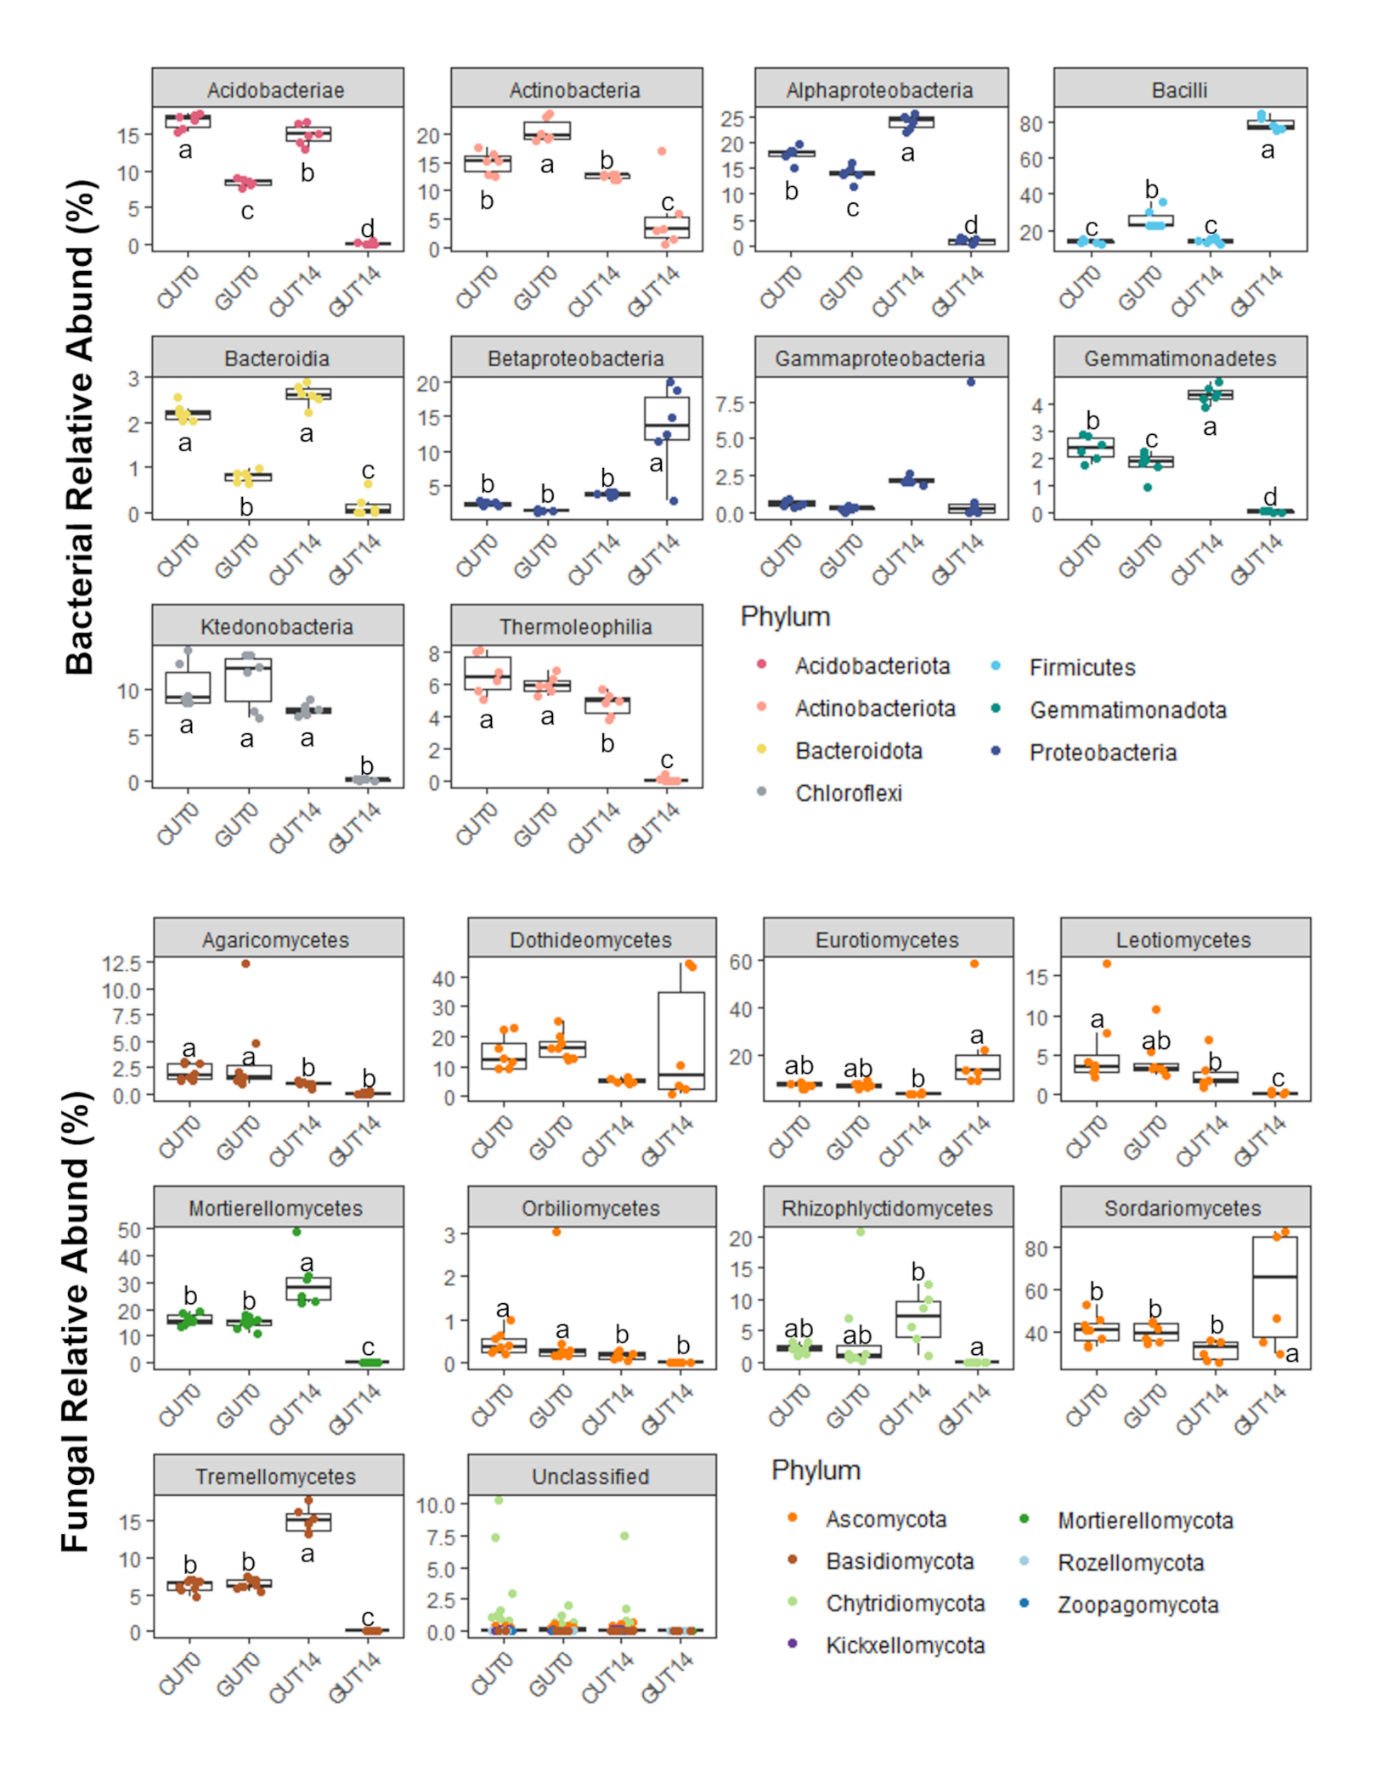
Fig. S5** Bacterial and fungal compositions at class level in control unplanted (CU) *vs.* gamma-irradiated unplanted (GU) soils at T0 and T14. Different colors referred to different bacterial or fungal phyla. Different letters indicated statistical significances (p < 0.05; n=6).


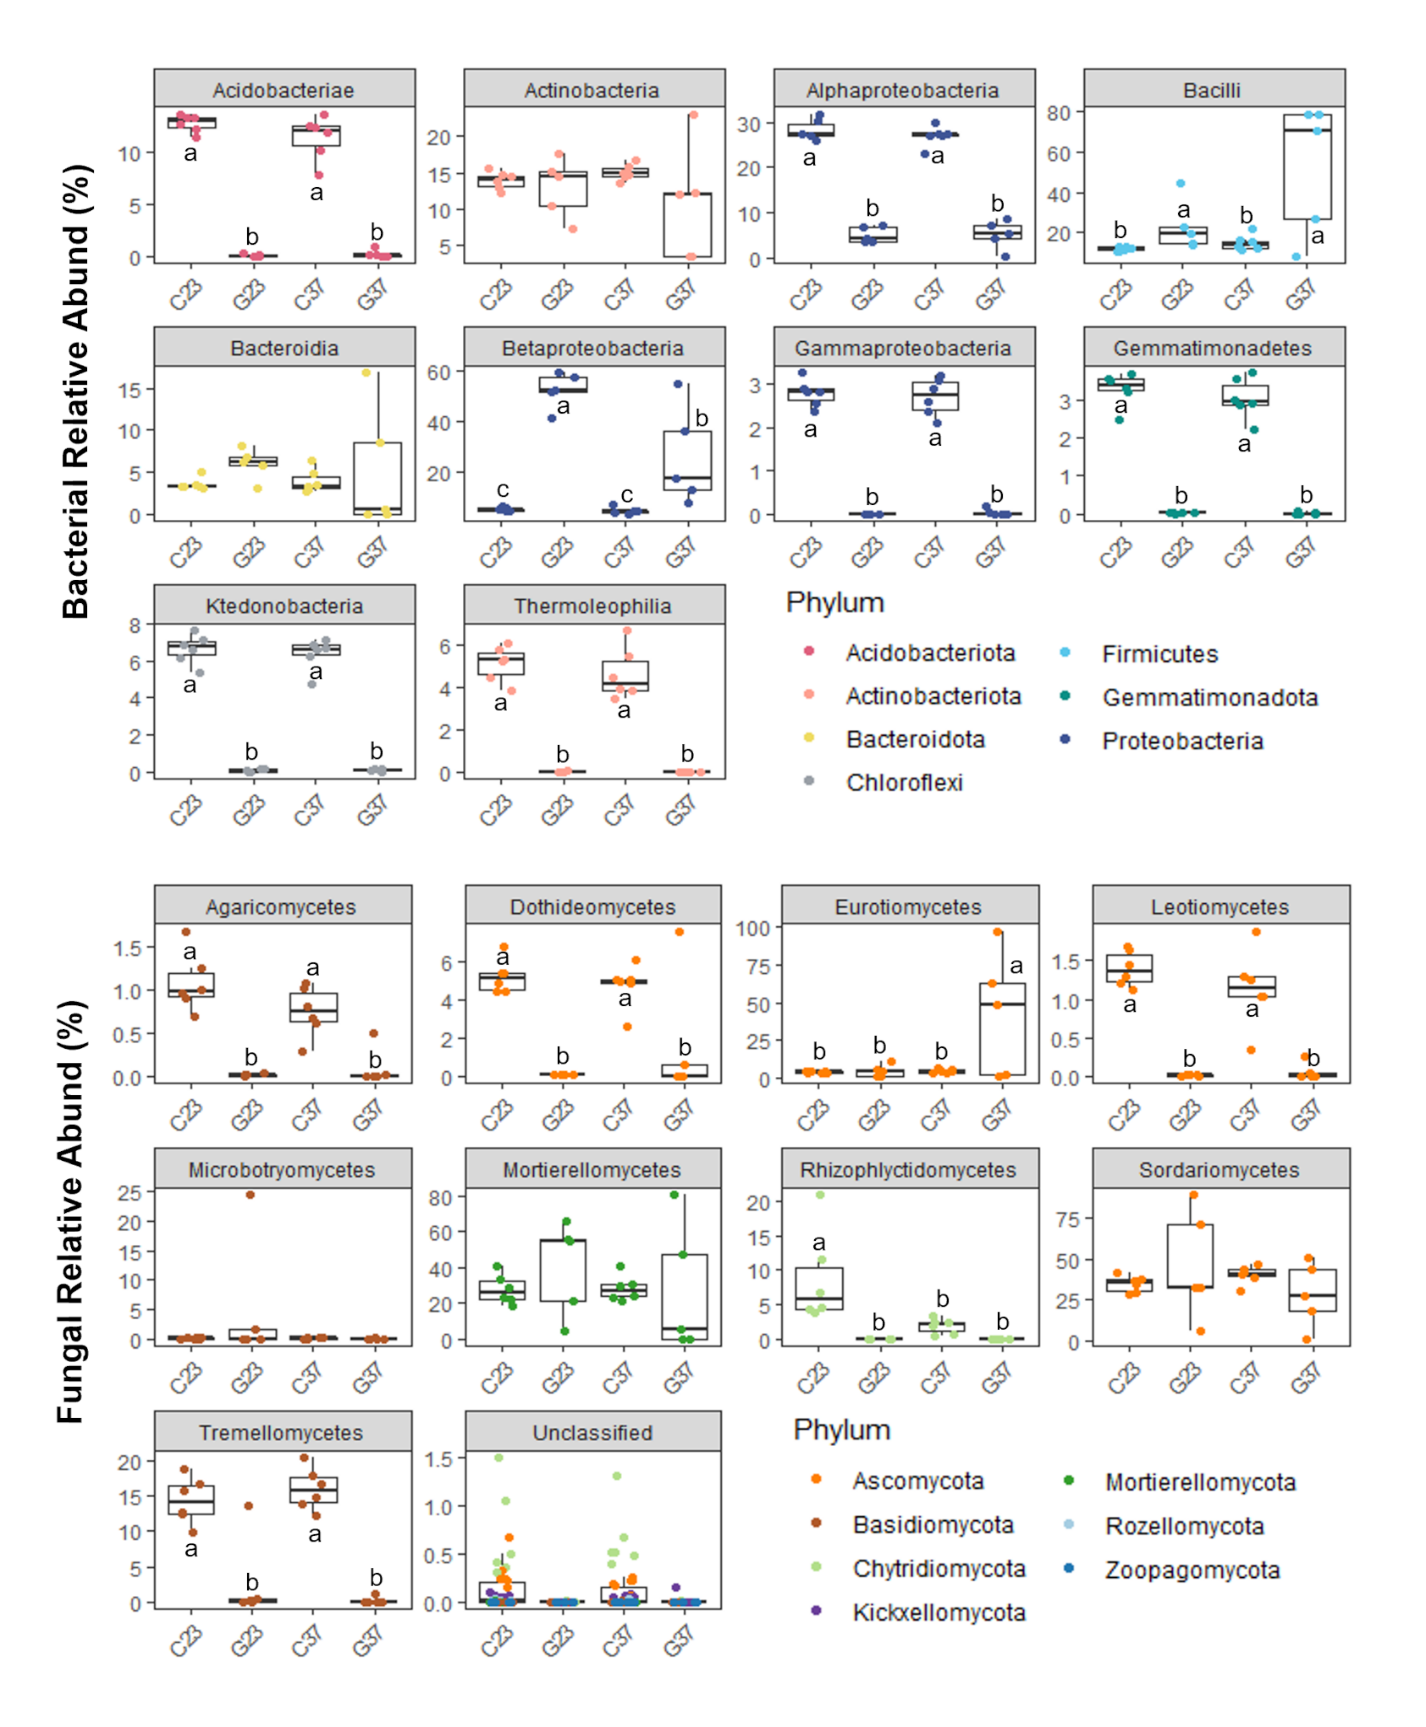
**Fig. S6** Bacterial and fungal compositions at class level in the rhizosphere of two canola genotypes (NAM23 and NAM37) grown in control untreated (C) *vs.* gamma-irradiated (G) soils at T14. Different colors referred to different bacterial or fungal phyla. Different letters indicated statistical significances (p < 0.05; n=6).

**
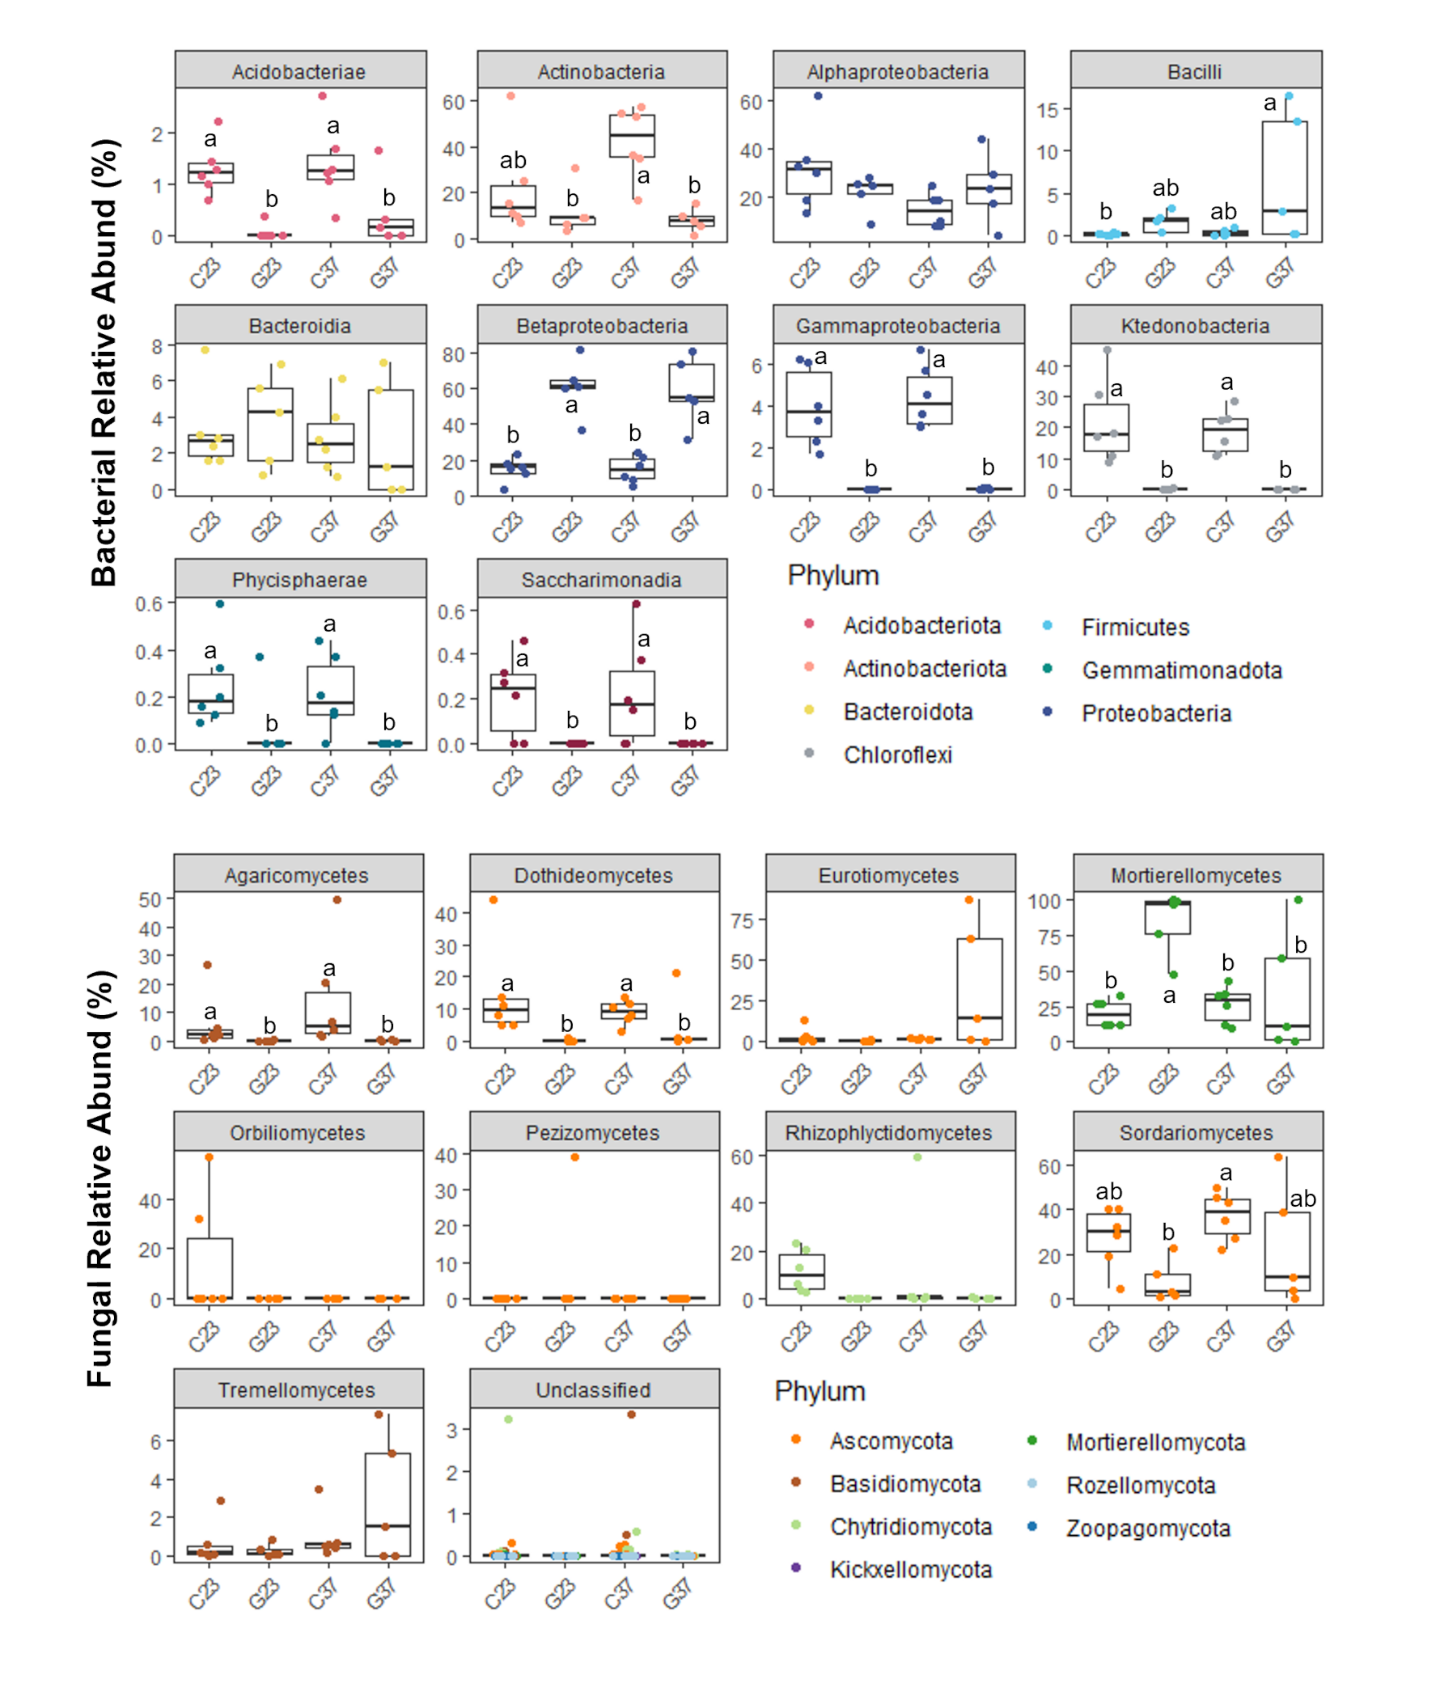
Fig. S7** Bacterial and fungal compositions at class level in roots of two canola genotypes (NAM23 and NAM37) grown in control untreated (C) *vs.* gamma-irradiated (G) soils at T14. Different colors referred to different bacterial or fungal phyla. Different letters indicated statistical significances (p < 0.05; n=6).


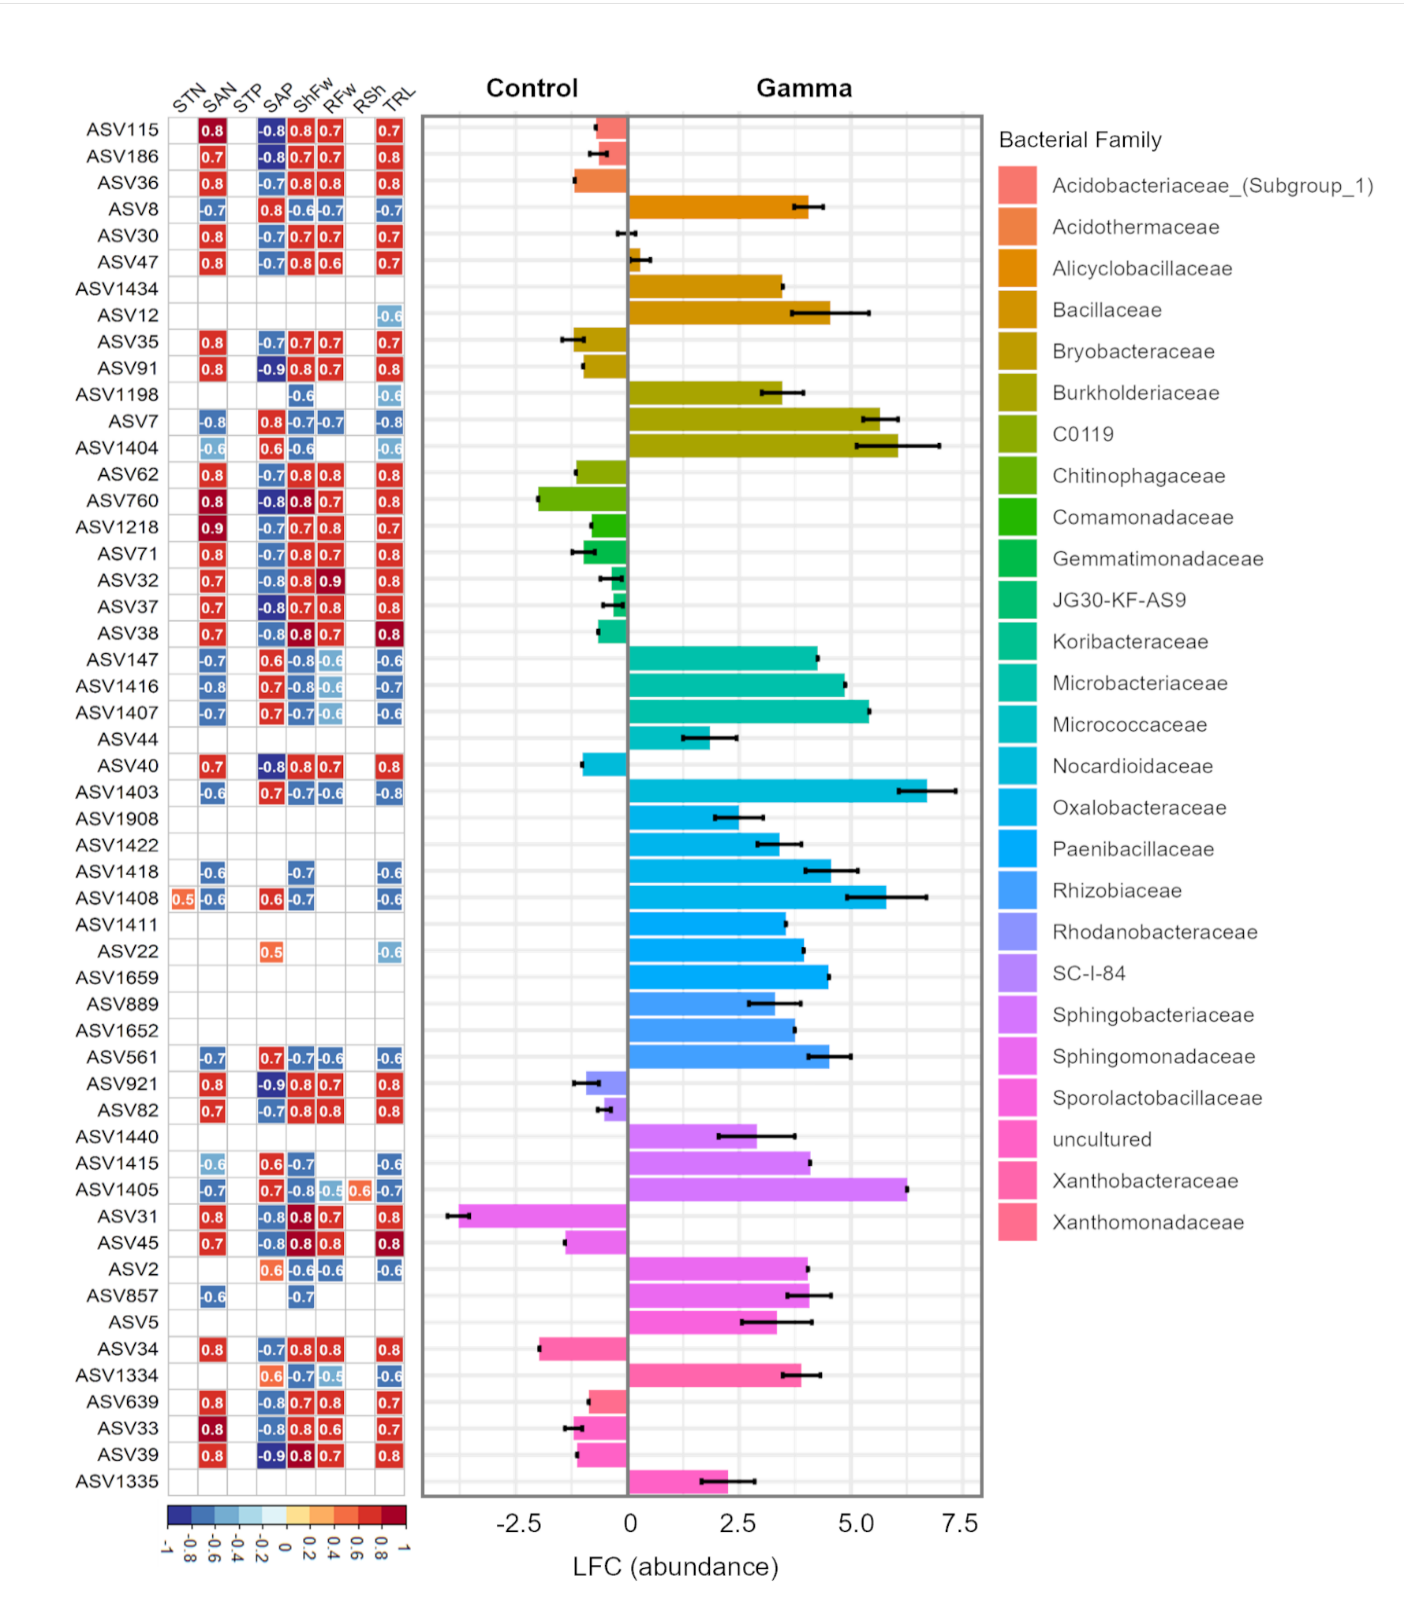
**Fig. S8** Log-fold change (LFC) abundance of differentially abundant bacterial ASVs in the canola rhizosphere: negative values (enriched in untreated control soils) *vs.* positive values (enriched in gamma-irradiated soils). Spearman’s correlogram linking bacterial and fungal ASVs to soil/plant parameters: STN (soil total nitrogen), SAN (available nitrogen), STP (total phosphorus), SAP (available phosphorus), ShFw (shoot fresh weight), RFw (root fresh weight), RSh (root/shoot ratio), TRL (total root length). Red/blue circles indicated significant positive/negative correlations, with correlation coefficients displayed on the correlogram (p < 0.01; n = 6).


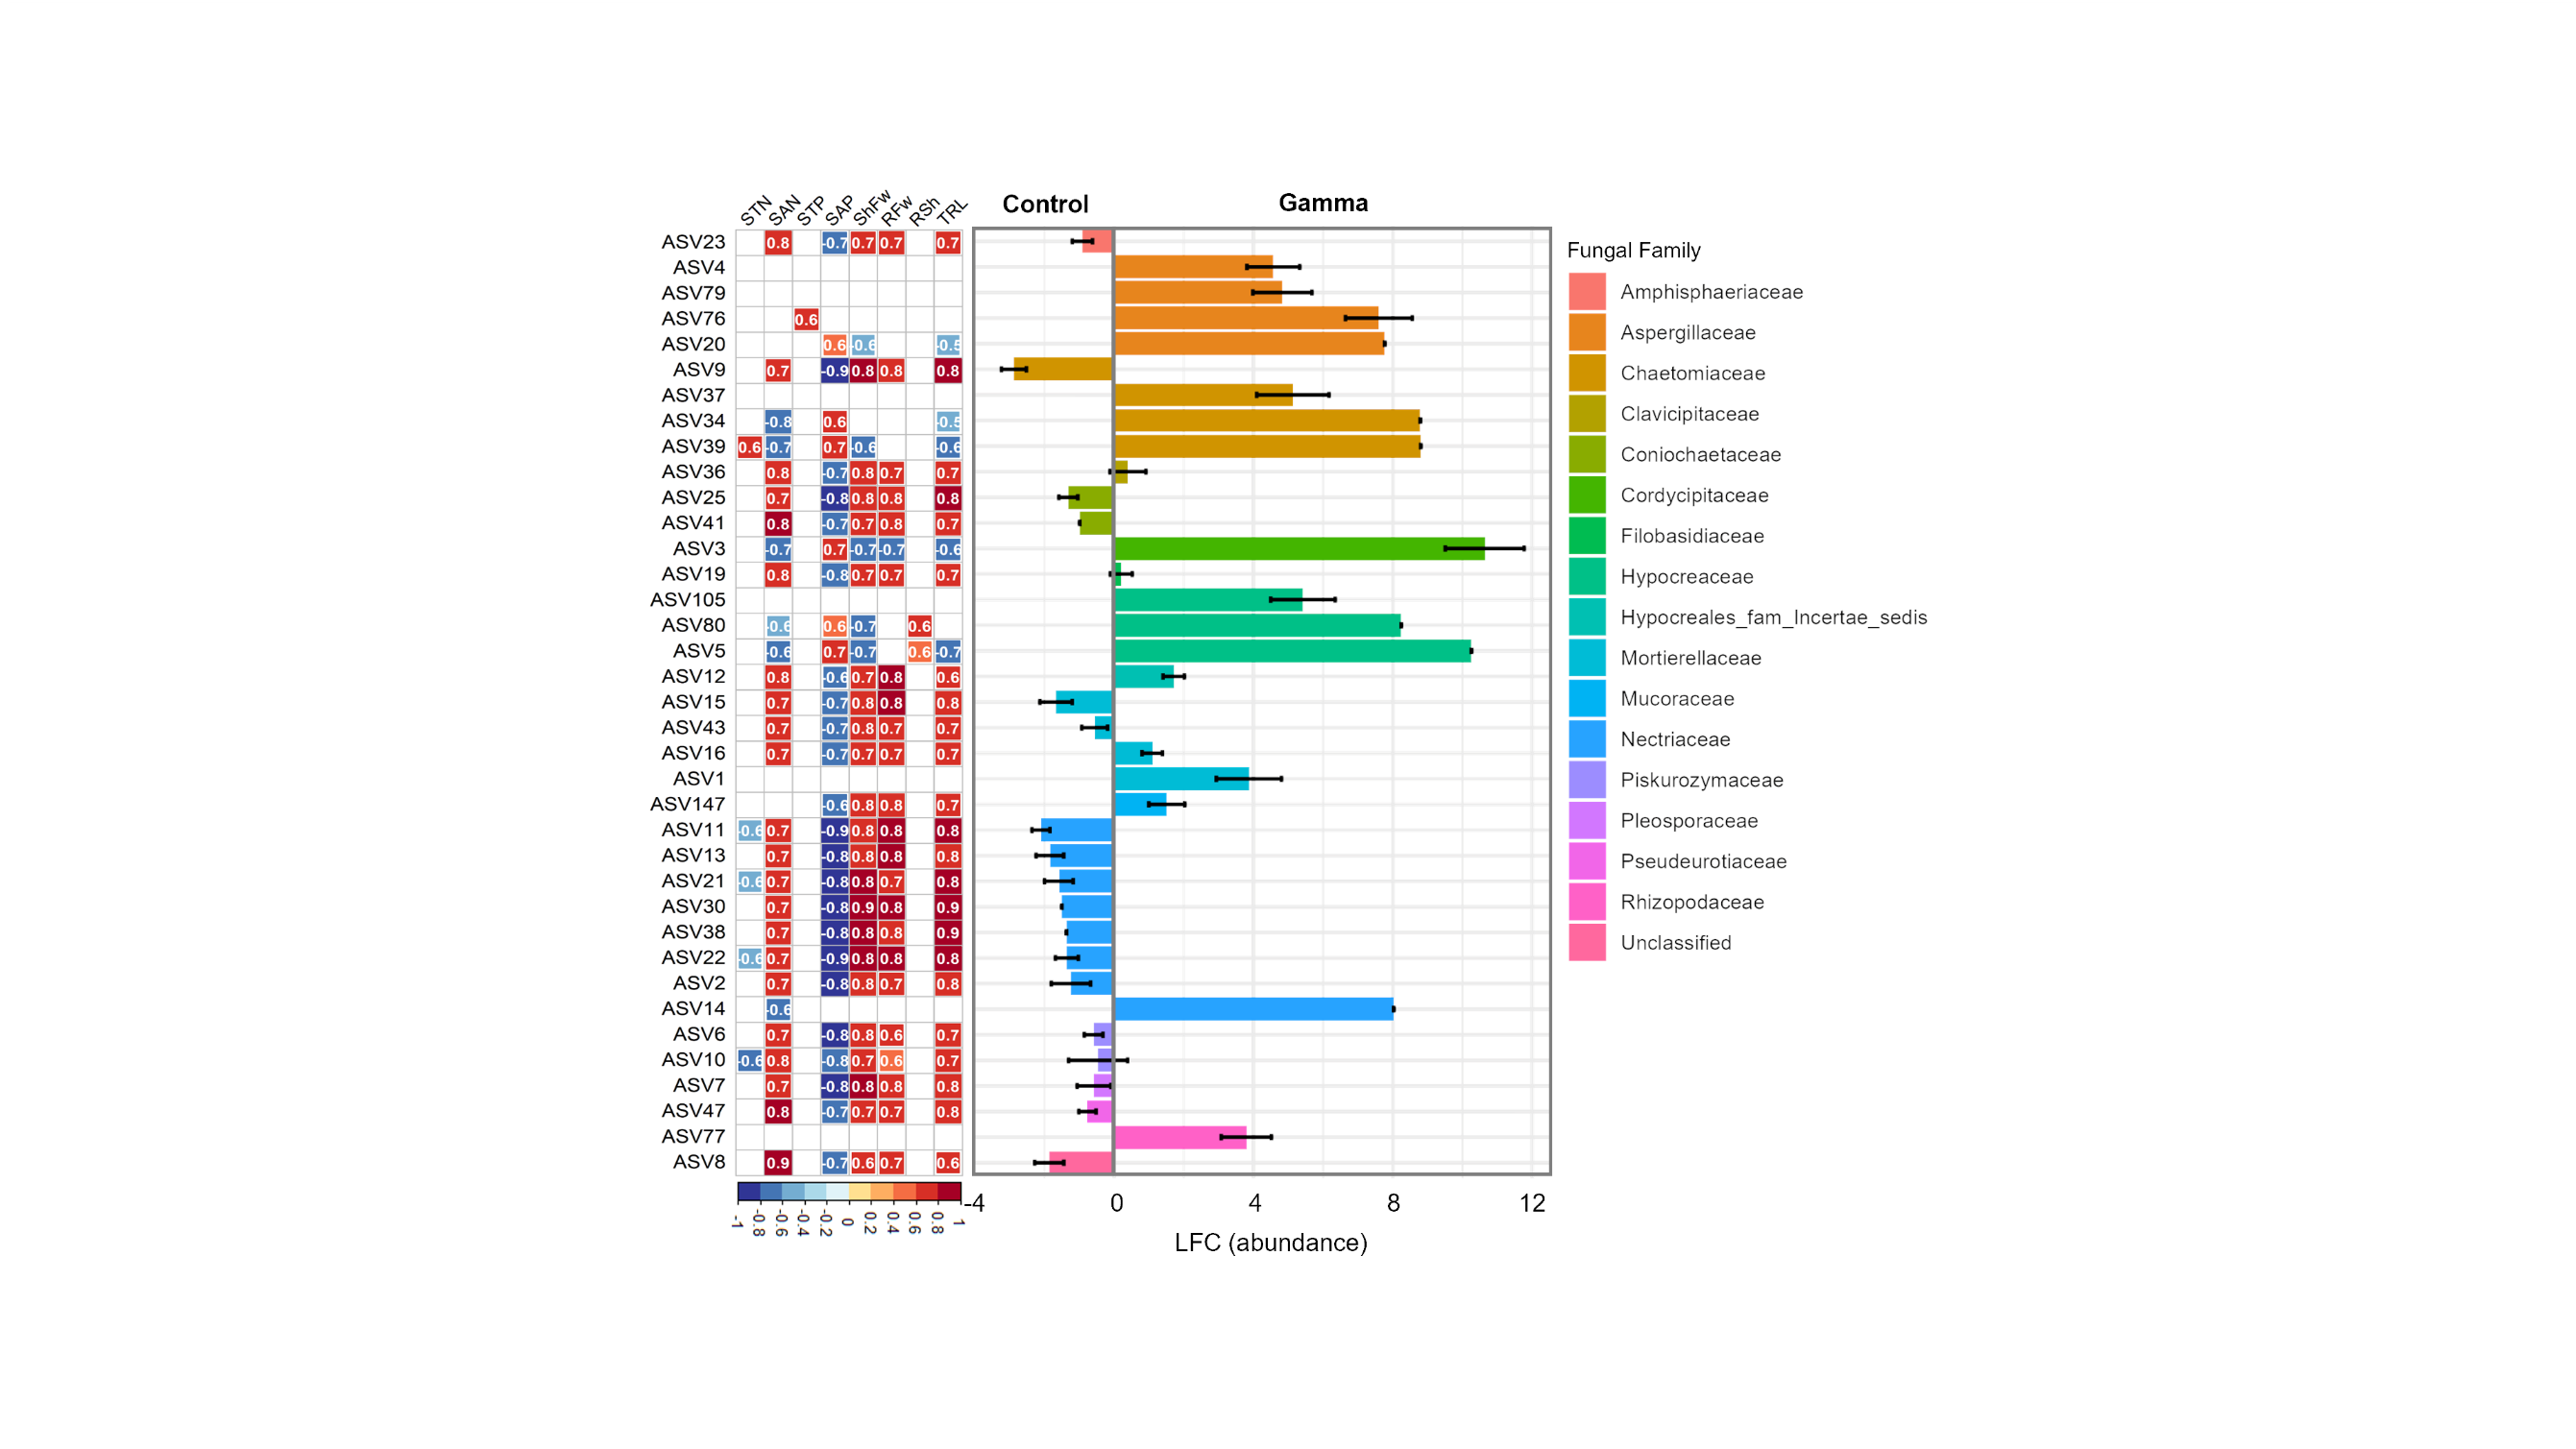
 **Fig. S9** Log-fold change (LFC) abundance of differentially abundant fungal ASVs in the canola rhizosphere: negative values (enriched in untreated control soils) *vs.* positive values (enriched in gamma-irradiated soils). Spearman’s correlogram linking bacterial and fungal ASVs to soil/plant parameters: STN (soil total nitrogen), SAN (available nitrogen), STP (total phosphorus), SAP (available phosphorus), ShFw (shoot fresh weight), RFw (root fresh weight), RSh (root/shoot ratio), TRL (total root length). Red/blue circles indicated significant positive/negative correlations, with correlation coefficients displayed on the correlogram (p < 0.01; n = 6).

**Table S1** PERMANOVA testing the effects of soil irradiation condition (Soil), sampling time (Time) and plant genotypes (Genotype) on bacterial and fungal communities in unplanted soil, rhizosphere soil, and the roots. Bold values denote statistically significant effects (p < 0.05).

**Table S2** Taxonomic classification of differentially abundant bacterial ASVs in canola roots grown in control untreated (Ctrl) *vs*. gamma-irradiated (Gam) soils (+/- indicated relatively higher/lower abundance, p < 0.001).

**Table S3** Taxonomic classification of differentially abundant fungal ASVs in canola roots grown in control untreated (Ctrl) *vs.* gamma-irradiated (Gam) soils (+/- indicated relatively higher/lower abundance, p < 0.001).

**Table S4** Taxonomic classification of differentially abundant bacterial and fungal ASVs in canola rhizosphere in control untreated (Ctrl) *vs.* gamma-irradiated (Gam) soils (+/- indicated relatively higher/lower abundance, p < 0.001).

## **Supplemental Methods**

**Method S1 Soil gamma-irradiation and verification of gamma-irradiation efficiency**

Field soil was collected from the Agriculture and Agri Food Canada (AAFC) field farm near Scott, SK (52°21'38.6"N, 108°50'00.8"W) from our previous field study [1]. Soil was sieved to < 2 mm particles and air dried. Then one kg of soil was packed into Ziploc bags (26.8 cm x 27.3 cm). To ensure uniform dose exposure during irradiation, 4 bags of soil were placed into a Rubbermaid Roughneck Stackable Storage Box (40 cm x 26 cm x 18 cm, length x width x height) with lid. In total, two boxes containing 8 kg of soil were prepared and sent for gamma irradiation.

Irradiation was performed at Nordion CANADA INC (Québec), using a sealed Cobalt-60 gamma source. The irradiation process delivered a cumulative minimum dose of 50 kGy to eliminate most microbial populations while preserving the soil’s physical and chemical integrity. Irradiation was performed over 10 cycles, with a minimum dose of 5 kGy per cycle, spanning a three-week period. Between irradiation events, the soil was stored at 4°C to maintain its integrity. Following irradiation, the treated soils were stored air-dried at 4°C until experimental use.

Following soil gamma-irradiation for sterilization, the efficacy of irradiation was assessed by comparing microbial communities in the gamma-irradiated and untreated control soils. This evaluation employed three complementary approaches: 1) culture-based assay where microbial colonies were cultivated on growth media to identify viable microorganisms; 2) soil CO2 respiration measurements to detect the microbial activity levels during incubation after the addition of sterile water; and 3) a culture-independent analysis to profile the unculturable microbial community by sequencing 16S rRNA for bacteria, including potential detection of DNA from both viable and non-viable microorganisms.

More specifically, for the culture-based assay, 1 ml of a 1:1 (w/v) soil suspension prepared from gamma-irradiated and untreated control soils was separately spread onto two types of media: 1/10 strength Tryptone Soya Agar (TSA) for bacteria and Potato Dextrose Agar (PDA) for fungi. Plates with TSA were incubated at 23 °C for 3 days, while plates with PDA were incubated at 23 °C for 5 days. Following incubation, images of bacterial and fungal colonies from both gamma-irradiated and untreated control soils were captured to visually compare the number and morphology of culturable colonies.

To measure soil CO₂ respiration, 50 g of air-dried, sieved soil (< 2 mm) was packed into 30-dram vials at a bulk density of 1.12 g cm⁻³. Deionized water was added to achieve 80% field capacity, and the vials were covered with perforated parafilm to maintain moisture while allowing gas exchange. Microcosms were pre-incubated in a dark chamber at 24 °C for 3 days to stabilize biological activity. After pre-incubation, microcosms were placed in 1 L mason jars sealed with lids fitted with septa for gas sampling and flushed with ultra-zero air (20.9% oxygen, 79.1% nitrogen; Linde Canada) at 1 L min⁻¹ for 7 minutes. The jars were incubated in a dark chamber at 24 °C, and headspace gas samples were collected at 24, 48, 72, and 120 hours. For each sample, 15 ml of headspace gas was withdrawn, and 10 ml was injected into a LI-7000 CO₂/H₂O Gas Analyzer (LI-COR Biosciences, Nebraska). CO₂ concentrations were determined using a standard curve generated from commercial CO₂ standards (350, 1000, 2000, 5000, and 10,000 ppmv).

To profile the unculturable bacterial community, DNA amplicon sequencing targeting the 16S rRNA V3-V4 region was conducted [1]. Culturable bacteria and fungi were largely reduced in the gamma-irradiated soil compared to the untreated soil, where no culturable microbial colonies were observed in gamma-irradiated soil (Fig. S1A). In addition, soil cumulative respiration was significantly higher in the control untreated soil (159 ug CO2 - C kg-1) compared to that in the gamma-irradiated soil (10 ug CO2 - C kg-1), which was the same as from air-dried soil (Fig. S1B). Bacterial evenness, richness and diversity were significantly higher in the untreated soil compared to the gamma-irradiated soil (Fig. S1C). Principal component analysis showed that bacterial community of the gamma-irradiated soil separated distinctively from the control untreated soil, with PC1 and PC2 in total explaining 37.2% of the variation (Fig. S1D). These results demonstrated the decreased microbial activity in the gamma-irradiated soil. Therefore, we verified that soil microbial diversity and viable microbial activity were significantly reduced in the gamma-irradiated soil.

**Method S2 Rhizobox construction, root imaging, and canola genotype screening**

Prior to the experiment, customized rhizoboxes were constructed and optimized for non-destructive root imaging and concurrent microbiome analysis. Each rhizobox (external dimensions: 46 × 30 × 0.3 cm; internal dimensions: 44.3 × 28 × 0.3 cm) comprised two glass panels separated by 3D-printed acrylic spacers, secured with aluminum U-channels (Fig. S2A). A custom rack was constructed to hold the rhizoboxes at a 30° angle from the horizontal, ensuring that the downward- facing imaging panel can maximize the visibility of root growth.

Root systems were imaged at 300 dpi using an Epson Scanner (Model EU-88, NO. B12B813362), ensuring sufficient resolution for detailed root trait analysis via WinRHIZO™ Tron software (Regents Instruments, CANADA INC, Québec), while minimizing exposure to scanning light. Manual tracing in WinRHIZO™ Tron facilitated root-background differentiation to capture root structures. Rhizoboxes were filled with sieved field soil (particle size < 2 mm) and were irrigated daily with sterilized deionized water. Irrigation volumes were adjusted on daily weight loss per rhizobox, thereby maintaining consistent soil moisture throughout the study.

Two canola genotypes with contrasting root system sizes were selected from a panel of 50 canola (*Brassica napus* L.*)* founder lines, which contributed a 2500-line nested association mapping (NAM) panel developed by Dr. Isobel Parkin et al. at AAFC Saskatoon [2]. A subset of 14 founder lines, previously evaluated by the Plant Phenotyping and Imaging Research Centre (P2IRC), provided the basis for selection. Leveraging existing field experiment data, the study aimed to integrate rhizobox-derived root data for broader comparative analyses. Initial screening for divergent root traits was performed in a 2D hydroponic pouch system (Fig. S2 B), narrowing the selection to a smaller group (Fig. S3). Subsequent screening in rhizoboxes containing 100% field soil confirmed significant differences between NAM23 and NAM37 in root system size, with notable variation in total root length, root fresh weight, as well as shoot fresh and dry weights (Fig. S4).

**Method S3 Experimental setup in rhizoboxes**

To minimize contamination from environmental microbial sources, temporary processing hoods (Fig. S2) were constructed using a metal frame encased in polythene plastic to reduce airflow and contamination from the working environment. Each rhizobox (internal volume 364 cm3, excluding a 1 cm soil-free top layer) was packed with 420 g dry soil to achieve a bulk density of 1.16 g cm-3. All rhizobox components were sterilized with 70% ethanol prior to use. Air-dried soil was pre-moistened to 15% (w/w) by spraying sterilized distilled water, sieved (< 2 mm), and homogenized. For each rhizobox, 483 g of pre-moistened soil was evenly distributed to form a 0.3 cm-thick layer, with the top 1 cm left free of soil using a soil blocker. The soil was homogenized by gentle tapping with a foam block, and a sterile scalpel created a planting hole at the top center.

Surface-sterilized canola seeds were germinated on germination paper until they reached root length of 3-4 cm. Seedlings were then transplanted into the planting hole (one plant per rhizobox) with soil gently pressed around the roots. To achieve field capacity (26%), 46 g of sterilized distilled water was evenly applied by spraying over the soil layer. Rhizoboxes were assembled with U-channels and 3D-printed clips, covered in plastic wrap to reduce moisture loss. Daily weight measurements guided water replenishment by syringe, maintaining consistent moisture levels.

**Method S4 Sampling in rhizoboxes**

On 14 days (T14) after transplanting, root images from both sides of each rhizobox were acquired using an EPSON scanner with root total length being quantified using WinRHIZO™ Tron (Method S2).

Following imaging, samples were collected in processing hoods after bench sterilization with 70 % ethanol. U-channels and glass panels were disassembled, and unplanted soil (8 samples per soil type) was sieved (< 2mm), homogenized, and sampled into two of 2 ml Eppendorf tubes at -80°C for microbiome studies.

To isolate the root-associated samples, Roots with attached soil were excised from shoots using a sterile scalpel and shaken vigorously five times to remove loosely adhered soil, leaving behind the rhizosphere fraction. The roots with rhizosphere soil were then transferred to a 250 ml Erlenmeyer flask containing 100 ml of 0.05 M NaCl and agitated at 180 rpm for 15 min at room temperature. Roots were then rinsed five times with sterilized distilled water and cut into 0.5 cm segments. The remaining soil suspension was transferred to 50 ml Falcon tubes, centrifuged at 3000 rpm for 15 min at room temperature, and the supernatant was discarded, retaining the rhizosphere soil pellet. Both rhizosphere and root samples were sub-sampled into 2 ml Eppendorf tubes and stored at -80°C for microbiome analysis.

Air-dried samples of sieved unplanted and rhizosphere soil at T14 were also sampled into two Whirl-Pak bags for chemical analysis with Agvise Laboratories (North Dakota, USA) for soil total and available N and P. Shoot fresh weights were recorded, and shoots were placed in labeled paper bags and dried at 50-60°C until constant weights were achieved to determine dry weights.

In addition, at the setup beginning of the experiment (T0), both irradiated soil and untreated control soils were homogenized and sampled into 2 ml Eppendorf tubes for microbiome studies, and into Whirl-Pak bags for chemical analysis with Agvise Laboratories (North Dakota, USA) for soil total and available N and P, total organic C, as well as total S contents.

**Method S5 Library preparation for shotgun sequencing**

Microbial DNA was extracted using the DNeasy® UltraClean® Microbial Kit (QIAGEN, Germany), following the manufacturer’s protocol. PCR amplification was performed using a T100™ Thermal Cycler (BIO-RAD, California). For bacterial 16S rRNA amplification, primers 27F (5’ to 3’AGAGTTTGATCMTGGCTCAG) and 1492R (5’ to 3’ TACGGYTACCTTGTTACGACTT) were used in a 20 ul volume PCR system (Frank et al., 2008). The reaction system contained 0.625 U of DreamTaq™ Hot Start DNA Polymerase (Thermo Scientific, CA), 1.25X DreamTaq Buffer (includes 2.5 mM MgCl2), 0.25 mM of each dNTP (Invitrogen, CA), 0.125 µM of each primer (IDT®, Coralville, IA), and 10 ng of DNA. The PCR conditions were as follows: 96°C for 4 min; followed by 30 cycles of 94°C for 30 s, 57°C for 30 s and 72°C for 1 min; then at 72°C for 10 min and finally hold at 4°C.

For fungi ITS amplification, primers ITS1 (5’ to 3’ TCCGTAGGTGAACCTGCGG) and ITS4 (5’ to 3’TCCTCCGCTTATTGATATGC) were used in a 25 ul volume PCR system (Kumar and Shukla, 2005). The reaction system contained 1X Platinum™ Green Hot Start PCR Master Mix (Thermo Scientific, CA), 0.4 µM of each primer (IDT®, Coralville, IA) and 10 ng of DNA. The PCR conditions were as follows: 95°C for 10 min; followed by 30 cycles of 95°C for 1 min, 55°C for 1 min and 72°C for 90 s; then at 72°C for 7 min and finally, held at 4°C. PCR products were purified [1] and then sent to Macrogen Inc. (South Korea) for Sanger sequencing.

## **References**

1. Liu M, Mooleki SP, Li Y, Schneider D, Kochian L V., Helgason BL. Phosphorus fertilizer responsive bacteria and fungi in canola (Brassica napus L.) roots are correlated with plant performance. Plant Soil. 2025;1-22.

2. Parkin I, Vail S, Robinson S. Development of a germplasm resource to dissect complex traits in Brassica napus. [Unpublished data]. 2017.
